# Supplementary material for: Crosstalk of Cellulose and Mannan Perception Pathways Leads to Inhibition of Cellulase Production in Several Filamentous Fungi
Source: PubMed Central journal article supplement (PMC6606794; doi:10.1128/mbio.00277-19), 2019-07-02

Fig S1.

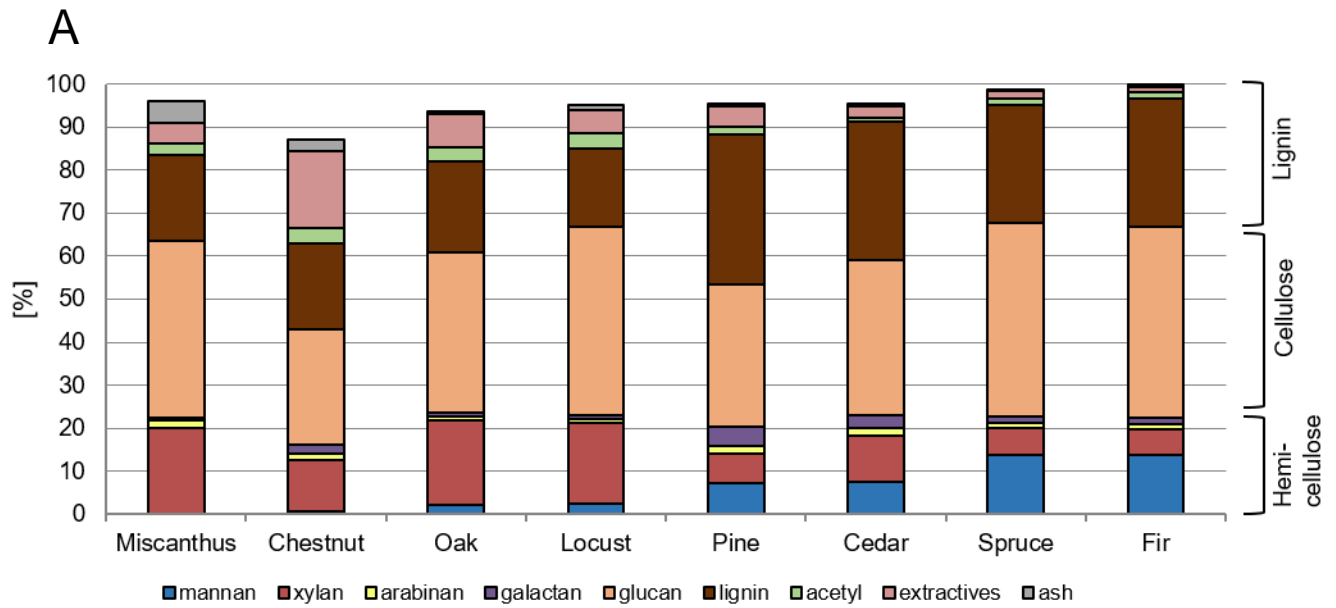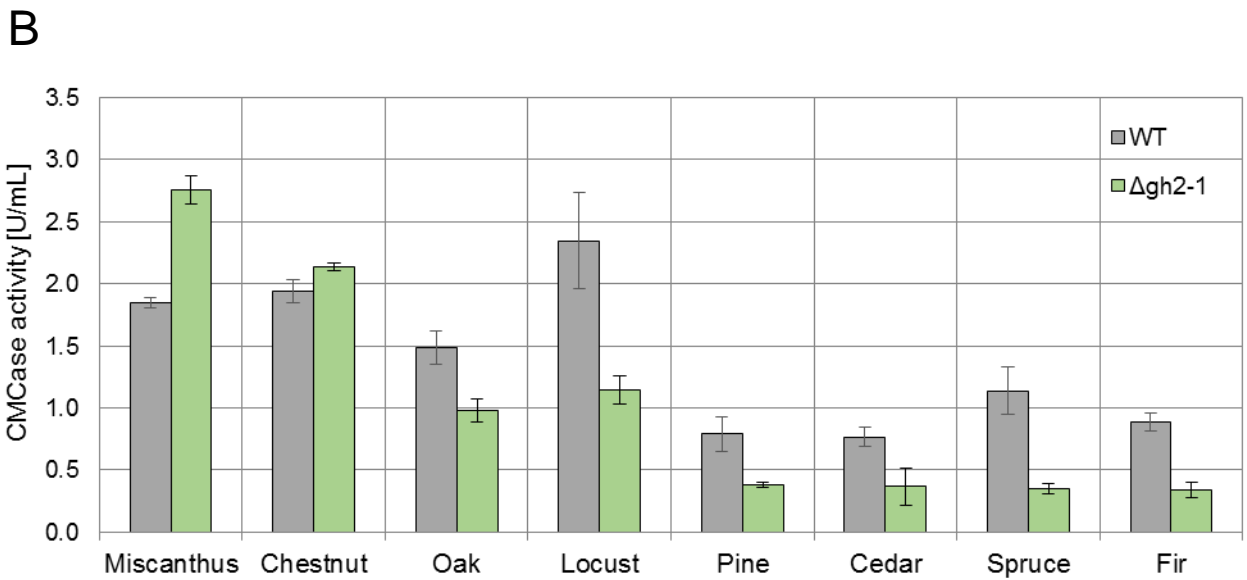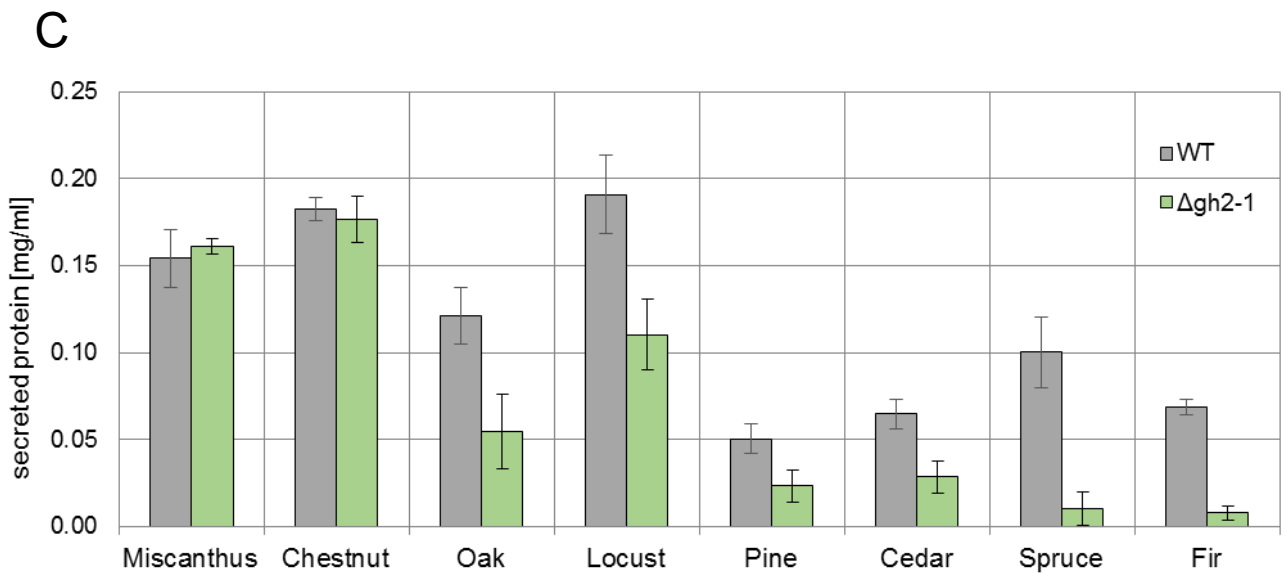

**D**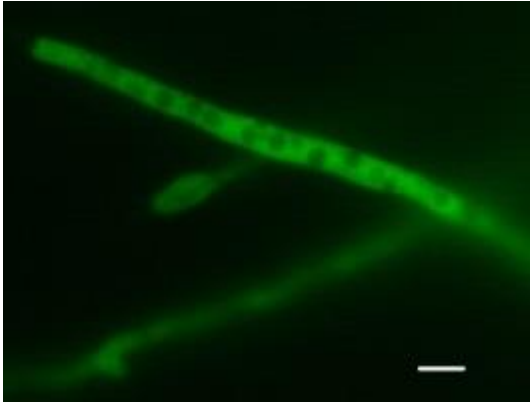**E**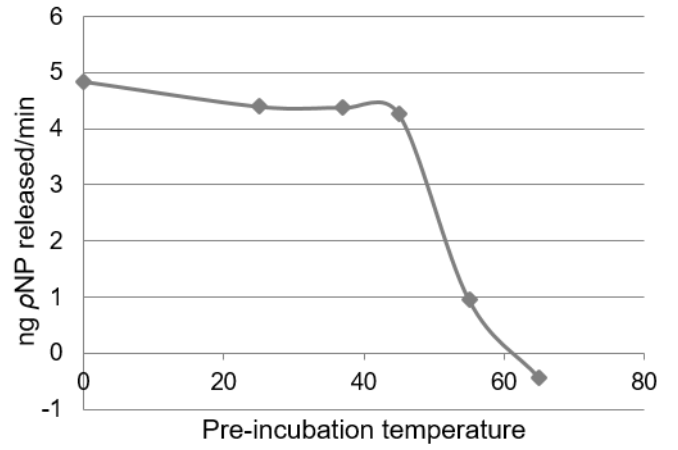**F**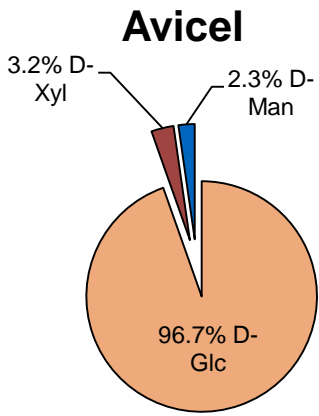**Bacterial cellulose**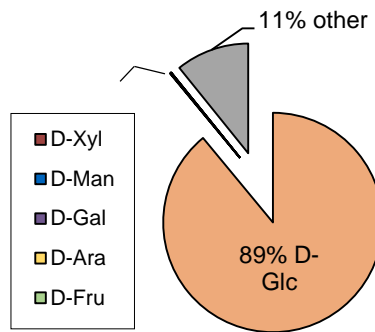

Supplement: mBio.00277-19-sf001.pdf [file mBio.00277-19-sf001.pdf]
